# Supplementary material
Source: Hindawi journal article supplement (doi:10.1155/2011/153979)
Supplement: f1 [file 153979.f1.pdf]

## Supplementary material

**Supplementary Table 1.** *PCR conditions and primers for LRPPRC sequencing*

| Primer Name / Region | Sequence 5'→3'          | Annealing Temperature (°C) | Cycles | PCR Additives | Length of PCR Fragment (bp) |
|----------------------|-------------------------|----------------------------|--------|---------------|-----------------------------|
| Ex 1F                | GGAGACGGAAGACGGAAAA     | 53                         | 35     | 5% Betaine    | 431                         |
| Ex 1R                | GCAGCTTGCCTGGAGAAAG     |                            |        |               |                             |
| Ex 2F                | GAGCTTTGCAGCATAAACTG    | 58                         | 35     | 5% Betaine    | 712                         |
| Ex 2R                | GTAGAAATGGGGTTTGCC      |                            |        |               |                             |
| Ex 3F                | ACACTGTACATTAGGATAGGA   | 53                         | 35     | 5% Betaine    | 439                         |
| Ex 3R                | ATGTCACTATACCTCACCA     |                            |        |               |                             |
| Ex 4F                | ATGCTTAGCTTGCTCTGTGTGA  | 53                         | 35     | 5% Betaine    | 570                         |
| Ex 5R                | CTGAAACAATTTCTCCATTAGG  |                            |        |               |                             |
| Ex 6F                | AGGGGATCAAAGGGATTAG     | 53                         | 35     | 5% Betaine    | 300                         |
| Ex 6R                | AGCATCTCAGCCATCTATCAC   |                            |        |               |                             |
| Ex 7F                | GTTTAGTATCTCGGTGCTGGT   | 53                         | 35     | 5% Betaine    | 401                         |
| Ex 8R                | TTCCATCATGTAAGAATAGC    |                            |        |               |                             |
| Ex 9F                | TCTTCAGTATTGGAACATTGG   | 53                         | 35     | 5% Betaine    | 800                         |
| Ex 11R               | CATTACAAATCGGTAAAAGGC   |                            |        |               |                             |
| Ex 12F               | AGGGGGATGAAGAAAGGAG     | 53                         | 35     | 5% Betaine    | 485                         |
| Ex 12R               | CTGGGCAATGAGAGAGAAAC    |                            |        |               |                             |
| Ex 13F               | CAGGAAAACAGGATCTTTGG    | 63                         | 35     | 5% Betaine    | 235                         |
| Ex 13R               | GCATGCCCTCAATAGTAACTG   |                            |        |               |                             |
| Ex 14F               | CTGACTCTGATTCTGCTG      | 53                         | 35     | 5% Betaine    | 637                         |
| Ex 14R               | GTCTGTAACTCCAACTGTC     |                            |        |               |                             |
| Ex 15F               | GAATATTTGAGGTGGGTGAGTG  | 53                         | 35     | 5% Betaine    | 271                         |
| Ex 15R               | CCTATGGTATTGGCTTGTAAACG |                            |        |               |                             |
| Ex 16F               | CTTGTTTGCTTCTCTGCTGC    | 53                         | 35     | 5% Betaine    | 322                         |
| Ex 16R               | AAAAAGCCTCCCAACCCTG     |                            |        |               |                             |
| Ex 17F               | GCTCCCAAACACATAATCT     | 53                         | 35     | 5% Betaine    | 693                         |
| Ex 18R               | GCTTCGTTTTAATGGCTGTC    |                            |        |               |                             |
| Ex 19F               | CGTGTGTTTTCTAATTCTGGGC  | 61                         | 35     | 5% Betaine    | 734                         |
| Ex 20R               | CATGCCATTCAAGGTGTAGC    |                            |        |               |                             |
| Ex 21F               | ATATCAAGGGGCAGAGTC      | 53                         | 35     | 5% Betaine    | 343                         |
| Ex 21R               | CTATCAAGGTCTGTAGAGCAG   |                            |        |               |                             |
| Ex 22F               | AGTTCAGGTCTTCTGATGAGC   | 53                         | 35     | 5% Betaine    | 253                         |
| Ex 22R               | CATGTTATTCCAGTGGCAAG    |                            |        |               |                             |
| Ex 23F               | GCTGGGCTTGAAATGCTG      | 61                         | 35     | 5% DMSO       | 478                         |
| Ex 23R               | AAGCCACAGGACCACAGG      |                            |        |               |                             |
| Ex 24F               | CCCCATTTTAGCTTTGTGGT    | 53                         | 35     | 5% Betaine    | 363                         |
| Ex 24R               | GCCTTCTGCTGGTTTCTCTTA   |                            |        |               |                             |
| Ex 25F               | CCCTTATCCTCACTAGTTCTCT  | 53                         | 35     | 5% Betaine    | 499                         |
| Ex 25R               | CAACCAGACTGCCTTTTC      |                            |        |               |                             |
| Ex 26F               | ATTCAGCCGAAGCCTTACCT    | 53                         | 35     | 5% Betaine    | 213                         |
| Ex 26R               | TCTCTCGAAGTCCCCAAATC    |                            |        |               |                             |
| Ex 27F               | AGTTCAACTGCCCTTTTGG     | 53                         | 35     | 5% Betaine    | 313                         |
| Ex 27R               | AAACTGCCTTCTGACAATCC    |                            |        |               |                             |
| Ex 28F               | CACTTTTGGTTCTTTCCCT     | 53                         | 35     | 5% Betaine    | 584                         |
| Ex 29R               | GCTTACACCCACACTGCTA     |                            |        |               |                             |
| Ex 30F               | GGGTTAGGTCTTTGTTTC      | 53                         | 35     | 5% Betaine    | 427                         |
| Ex 30R               | TGTACTGCACTGTATATGGC    |                            |        |               |                             |
| Ex 31F               | CCAACCTTGTCATCTGTCA     | 53                         | 35     | 5% Betaine    | 326                         |
| Ex 31R               | ACGTAAAGGTCAAGCATTG     |                            |        |               |                             |
| Ex 32F               | GCATTAAAGTCAGCACAGGTCAT | 53                         | 35     | 5% Betaine    | 396                         |
| Ex 32R               | CAGCAACTAGCATCAACATTCC  |                            |        |               |                             |
| Ex 33F               | ATGTGATTCAGGGTTTCAG     | 53                         | 35     | 5% Betaine    | 641                         |
| Ex 34R               | ACCACACGCCTATGTCTAG     |                            |        |               |                             |
| Ex 35F               | TGGCATAGCTTGCACTTGT     | 53                         | 35     | 5% Betaine    | 422                         |
| Ex 35R               | AGCTAACAGACGACAAAAGTAC  |                            |        |               |                             |
| Ex 36F               | ATACAAGGGACAATAGTGC     | 53                         | 35     | None          | 346                         |
| Ex 36R               | CTTTGAGCTGAAGACTAAGAC   |                            |        |               |                             |
| Ex 37F               | CTGAGTGGCTGTTTGGTG      | 53                         | 35     | None          | 340                         |
| Ex 37R               | GCTCTTACAGAGATCTAATCCTC |                            |        |               |                             |
| Ex 38F               | ATCACCTTTGCTGGTATCTC    | 53                         | 35     | 5% Betaine    | 638                         |
| Ex 38R               | TTGGGTCTCTGCTTCTCAC     |                            |        |               |                             |
| 3'UTRF               | TTAGTCTGCTGTTTCTCTG     | 53                         | 35     | None          | 593                         |
| 3'UTRR               | AACCTCTCTGACTACCTATC    |                            |        |               |                             |
